# Supplementary material for: Transcriptomic analysis of Spodoptera frugiperda Sf9 cells resistant to Bacillus thuringiensis Cry1Ca toxin reveals that extracellular Ca2+, Mg2+ and production of cAMP are involved in toxicity
Source: PubMed Central journal article supplement (PMC6503997; doi:10.1242/bio.037085), 2019-03-29
Supplement: biolopen-8-037085-s1.pdf [file biolopen-8-037085-s1.pdf]

## Supplementary information

**Table S1:** lists of genes differentially up- or down-regulated, with an absolute value of log<sub>2</sub>-fold-change greater than 1, specifically in Sf9-LD<sub>50</sub> (sheet #1), specifically in Sf9-LD<sub>80</sub> (sheet #2) or common to both resistant cell lines (sheet #3). Genes are ordered using the fold change of expression from the most up-regulated to the most down-regulated.

[Click here to Download Table S1](#)
